# Supplementary material
Source: publisher site journal article supplement (https://www.dovepress.com/article/379205)

**Figure S1 : 1H NMR Spectra of compound FA2**


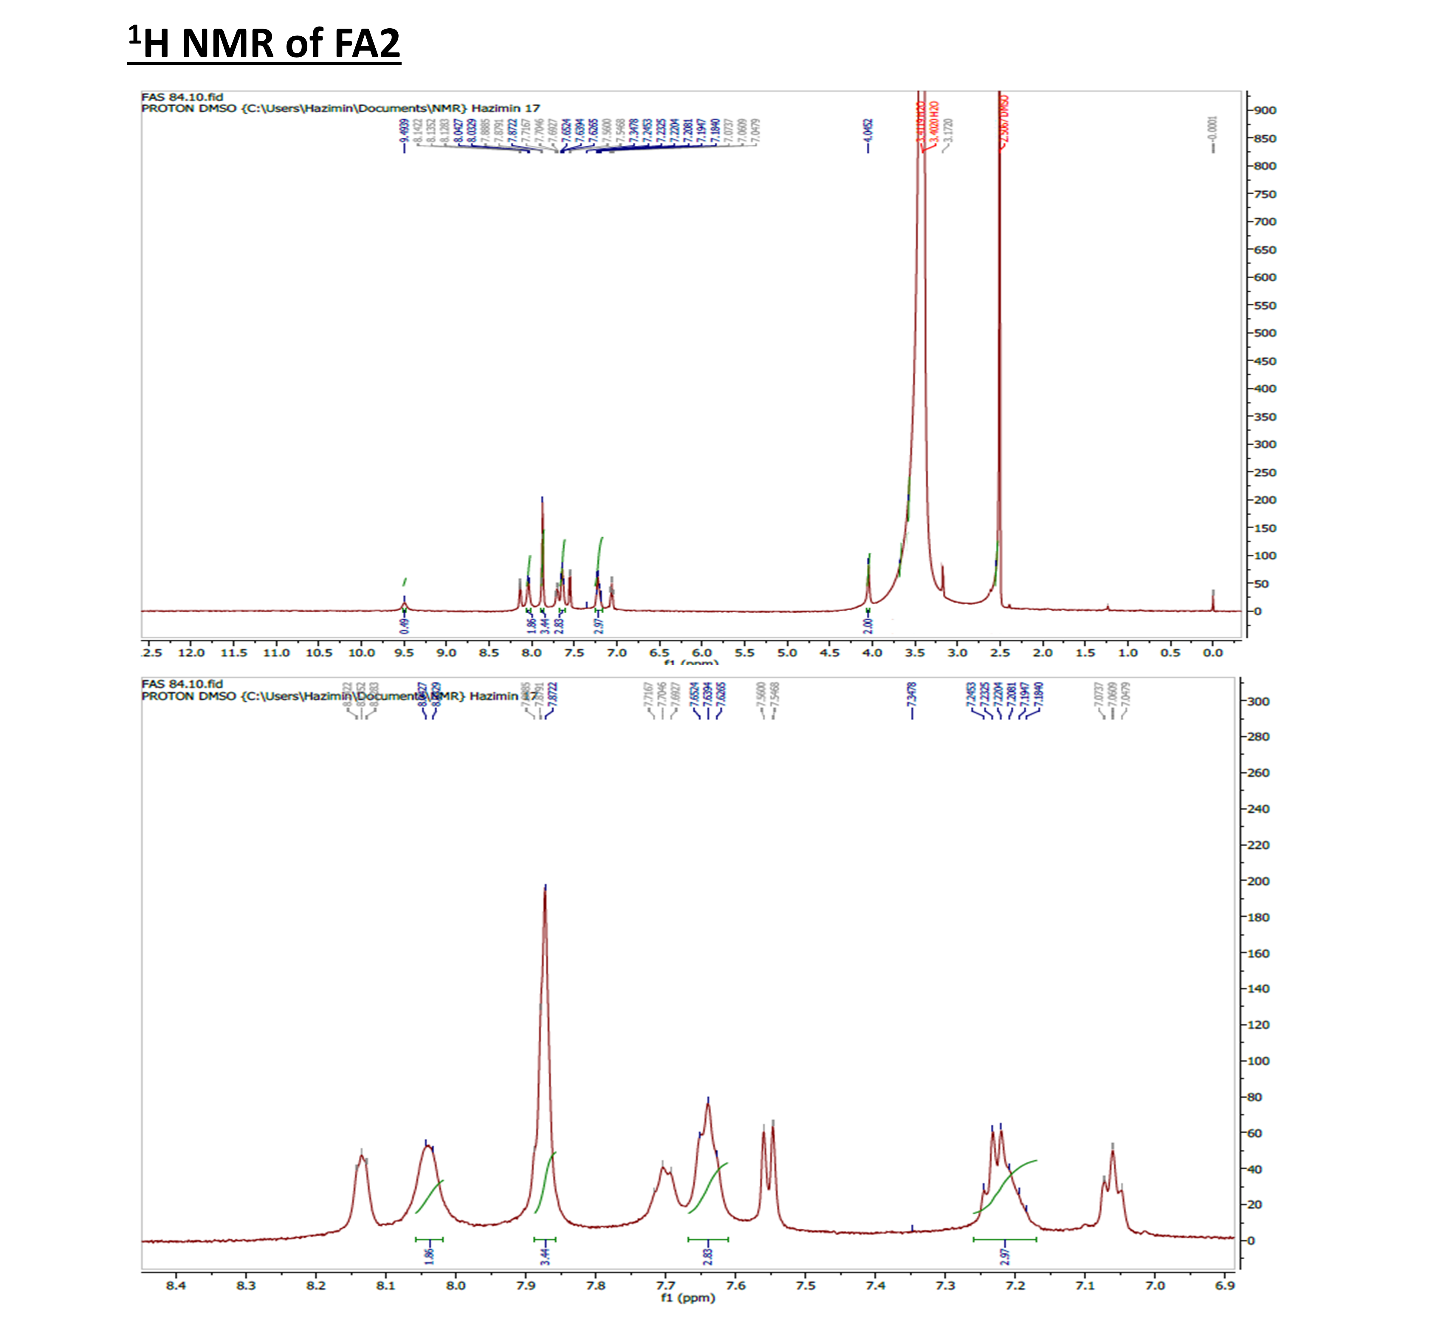


**FigureS2: 13C NMR spectra of Compound FA2**


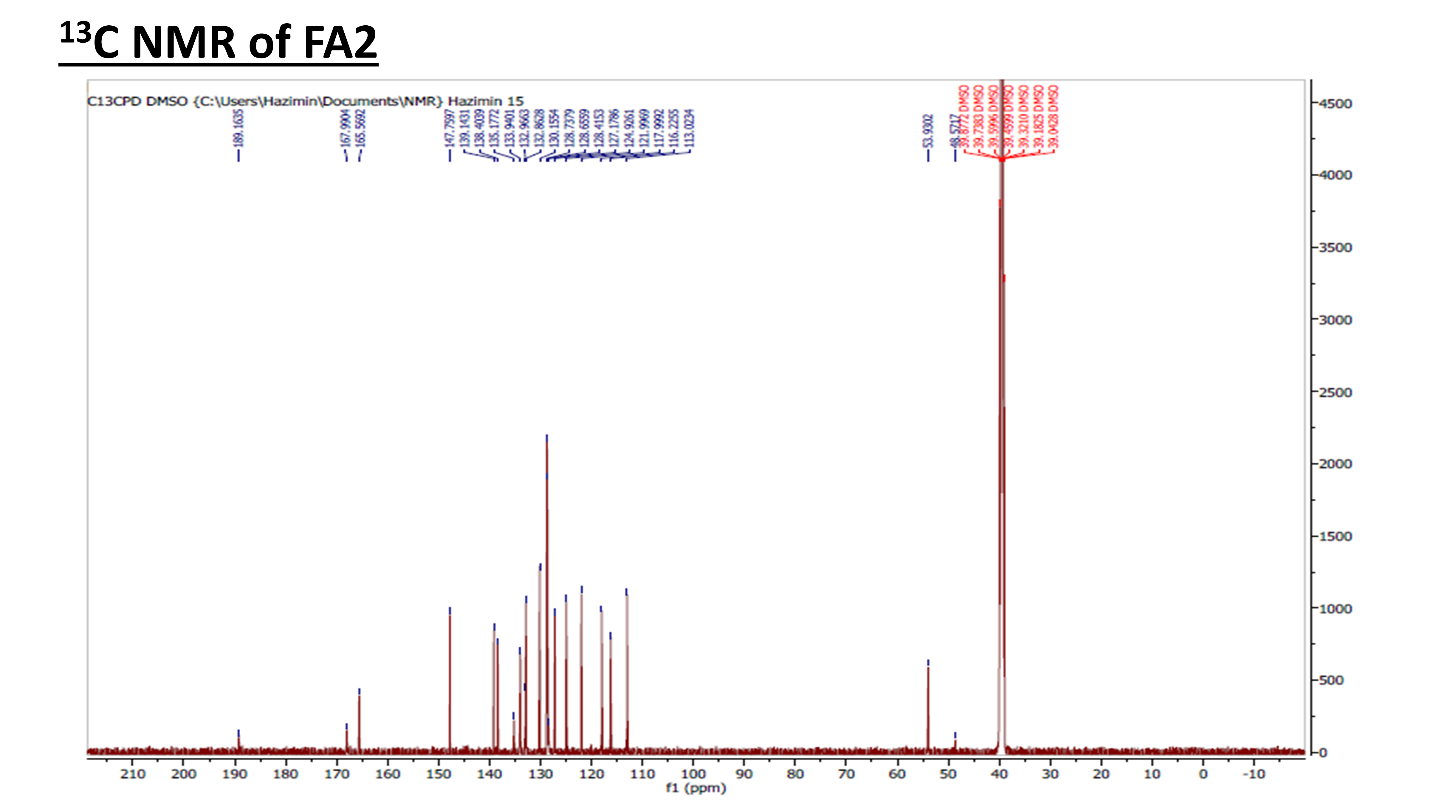


**Figure S3: Mass spectra of compound FA2**


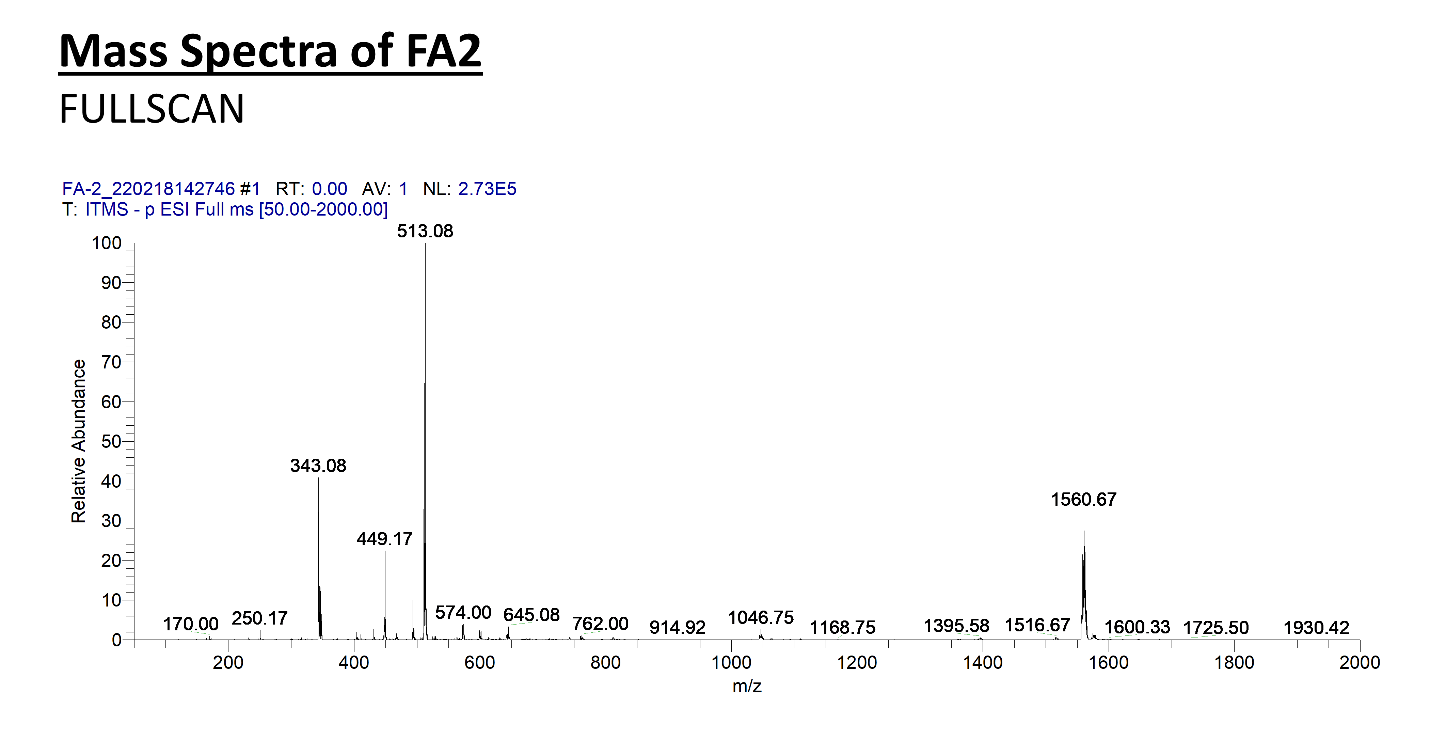

Supplement: Supplementary file 1 [file get_supplementary_file.php]
